# Supplementary material for: Estrogenic Activity of Mycoestrogen (3β,5α,22E)-Ergost-22-en-3-ol via Estrogen Receptor α-Dependent Signaling Pathways in MCF-7 Cells
Source: MDPI journal article supplement (doi:10.3390/molecules27010036), 2021-12-22

## Supplementary Materials

---

### Estrogenic Activity of Mycoestrogen (3 $\beta$ ,5 $\alpha$ ,22 $E$ )-Ergost-22-en-3-ol via Estrogen Receptor $\alpha$ -Dependent Signaling Pathways in MCF-7 cells

Dahae Lee <sup>1,†</sup>, Yuri Ko <sup>2,†</sup>, Changhyun Pang <sup>3</sup>, Yoon-Joo Ko <sup>4</sup>, You-Kyoung Choi <sup>1</sup>, Ki Hyun Kim <sup>2,5,\*</sup> and Ki Sung Kang <sup>1,\*</sup>

<sup>1</sup> College of Korean Medicine, Gachon University, Seongnam 13120, Korea; pjsldh@gachon.ac.kr (D.L.); kosmos@gachon.ac.kr (Y-K.C.);

<sup>2</sup> Department of Biological Chemistry and Molecular Pharmacology, Harvard Medical School, Boston, MA, USA; koyr0120@gmail.com (Y.K.)

<sup>3</sup> School of Chemical Engineering, Sungkyunkwan University, Suwon 16419, Korea; chpang@skku.edu (C.P.)

<sup>4</sup> Laboratory of Nuclear Magnetic Resonance, National Center for Inter-University Research Facilities (NCIRF), Seoul National University, Gwanak-gu, Seoul 08826, Korea; yjko@snu.ac.kr (Y.J.K.)

<sup>5</sup> School of Pharmacy, Sungkyunkwan University, Suwon 16419, Korea

\* Correspondence: kkang@gachon.ac.kr (K.S.K.); khkim83@skku.edu (K.H.K.); Tel.: +82-31-750-5402 (K.S.K.); +82-31-290-7700 (K.H.K.)

† These authors contributed equally to this study

**Supplementary Materials Contents:**

Figure S1: The  $^1\text{H}$  NMR spectrum of **1** ( $\text{CDCl}_3$ , 700 MHz), Figure S2: The  $^1\text{H}$  NMR spectrum of **2** ( $\text{CDCl}_3$ , 700 MHz), Figure S3: The  $^1\text{H}$  NMR spectrum of **3** ( $\text{CDCl}_3$ , 700 MHz), Figure S4: The  $^{13}\text{C}$  NMR spectrum of **3** ( $\text{CDCl}_3$ , 175 MHz), Figure S5: The  $^1\text{H}$  NMR spectrum of **4** ( $\text{CD}_3\text{OD}$ , 700 MHz), Figure S6: The  $^1\text{H}$  NMR spectrum of **5** ( $\text{CDCl}_3$ , 700 MHz), Figure S7: The  $^1\text{H}$  NMR spectrum of **6** ( $\text{CDCl}_3$ , 700 MHz), Figure S8: The  $^1\text{H}$  NMR spectrum of **7** ( $\text{CDCl}_3$ , 700 MHz), Figure S9: The  $^1\text{H}$  NMR spectrum of **8** ( $\text{CDCl}_3$ , 700 MHz), Figure S10: Total ion chromatogram (TIC) of compound **1** in the LC/MS analysis, Figure S11: TIC of compound **2** in the LC/MS analysis, Figure S12: TIC of compound **3** in the LC/MS analysis, Figure S13: TIC of compound **4** in the LC/MS analysis, Figure S14: TIC of compound **5** in the LC/MS analysis, Figure S15: TIC of compound **6** in the LC/MS analysis, Figure S16: TIC of compound **7** in the LC/MS analysis, Figure S17: TIC of compound **8** in the LC/MS analysis, Figure S18: UV chromatogram of LC/MS (detection wavelength was set as 254 nm) of (A) hexane-soluble and (B)  $\text{CH}_2\text{Cl}_2$ -soluble fractions, Figure S19: TLC analysis of (A) hexane-soluble and (B)  $\text{CH}_2\text{Cl}_2$ -soluble fractions.

**Figure S1.** The  $^1\text{H}$  NMR spectrum of **1** ( $\text{CDCl}_3$ , 700 MHz)

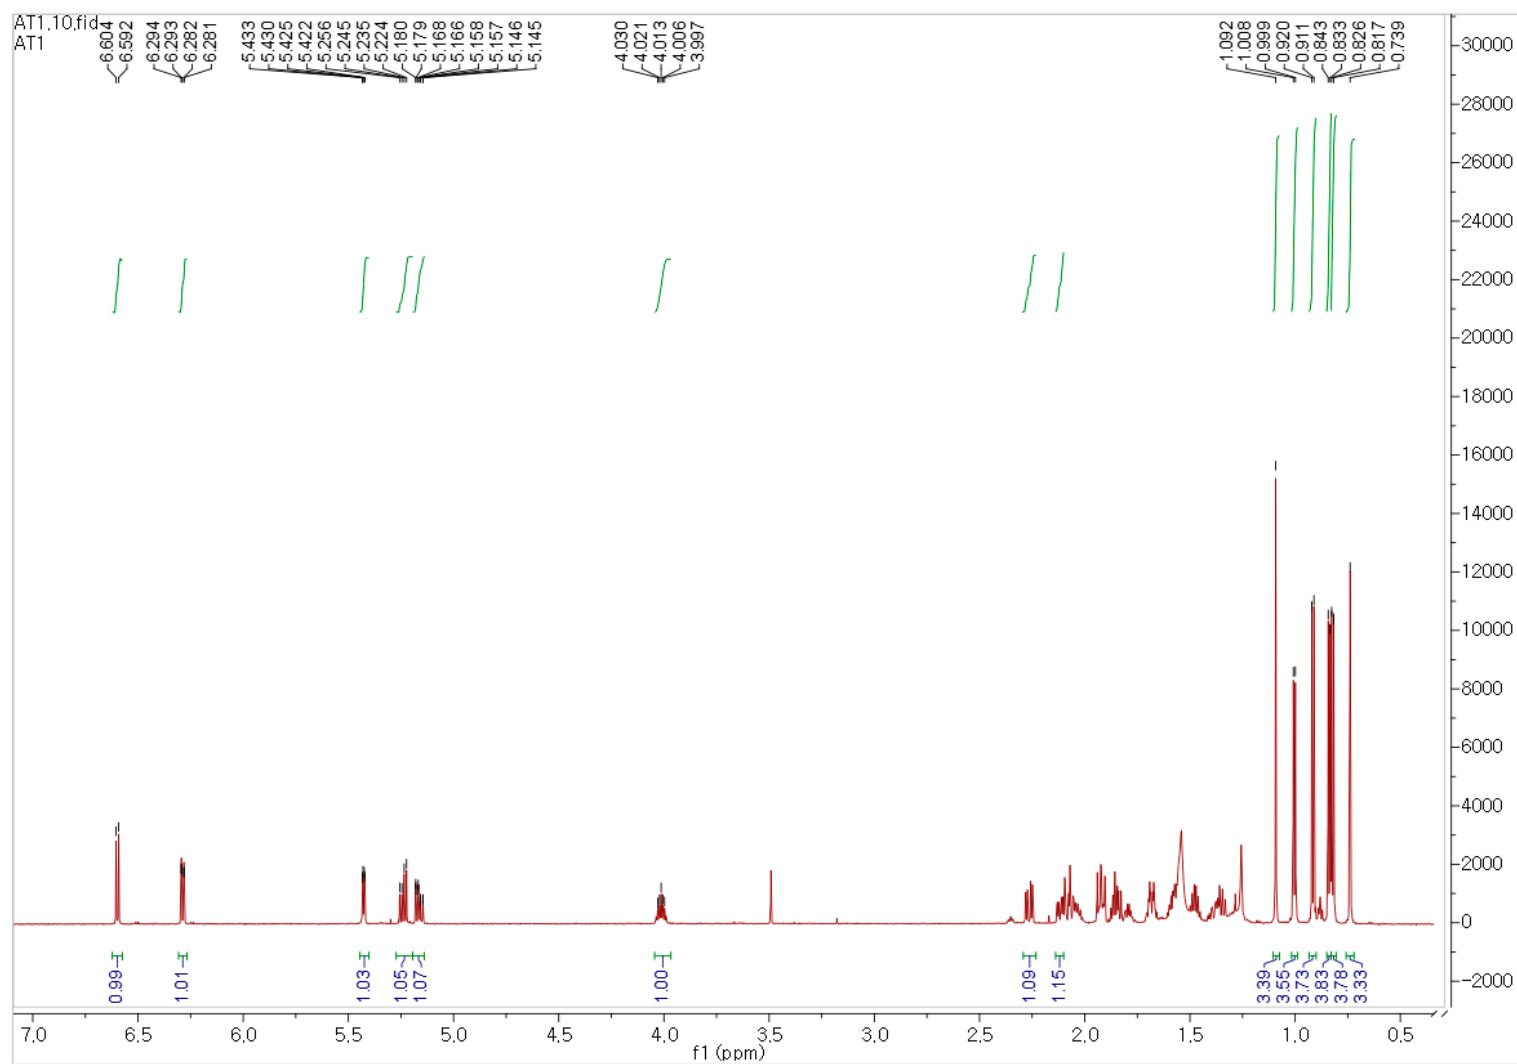

**Figure S2.** The  $^1\text{H}$  NMR spectrum of **2** ( $\text{CDCl}_3$ , 700 MHz)

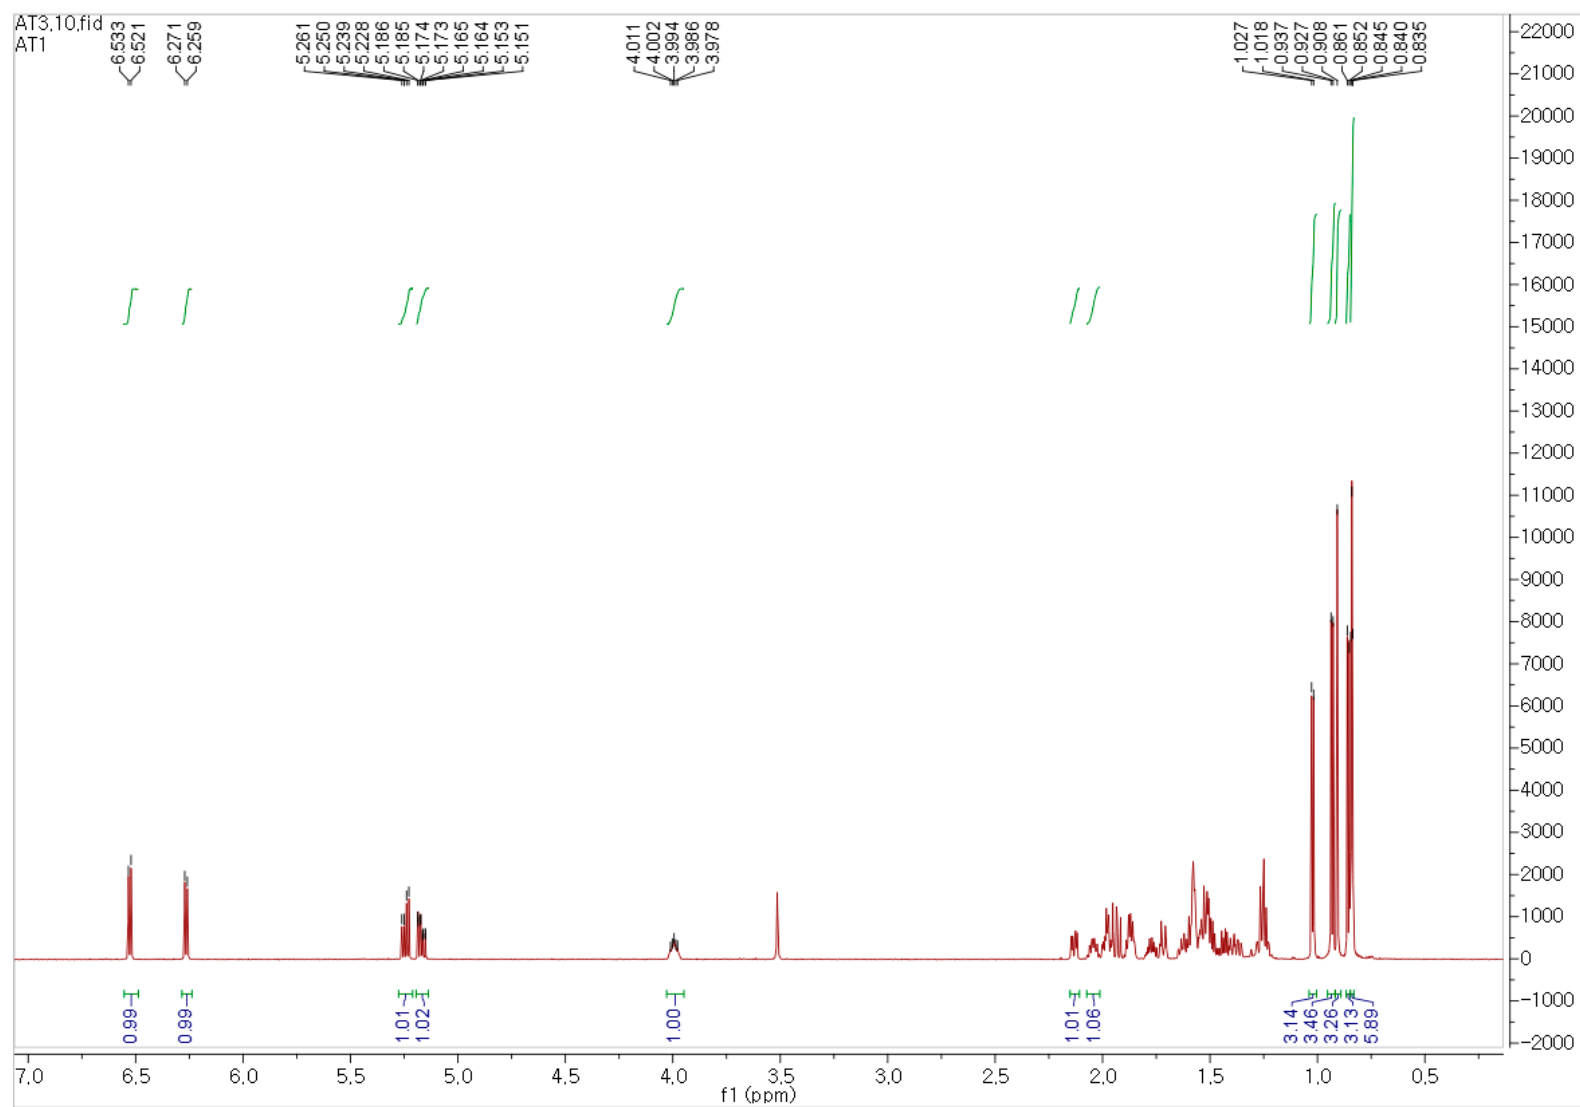

**Figure S3.** The  $^1\text{H}$  NMR spectrum of **3** ( $\text{CDCl}_3$ , 700 MHz)

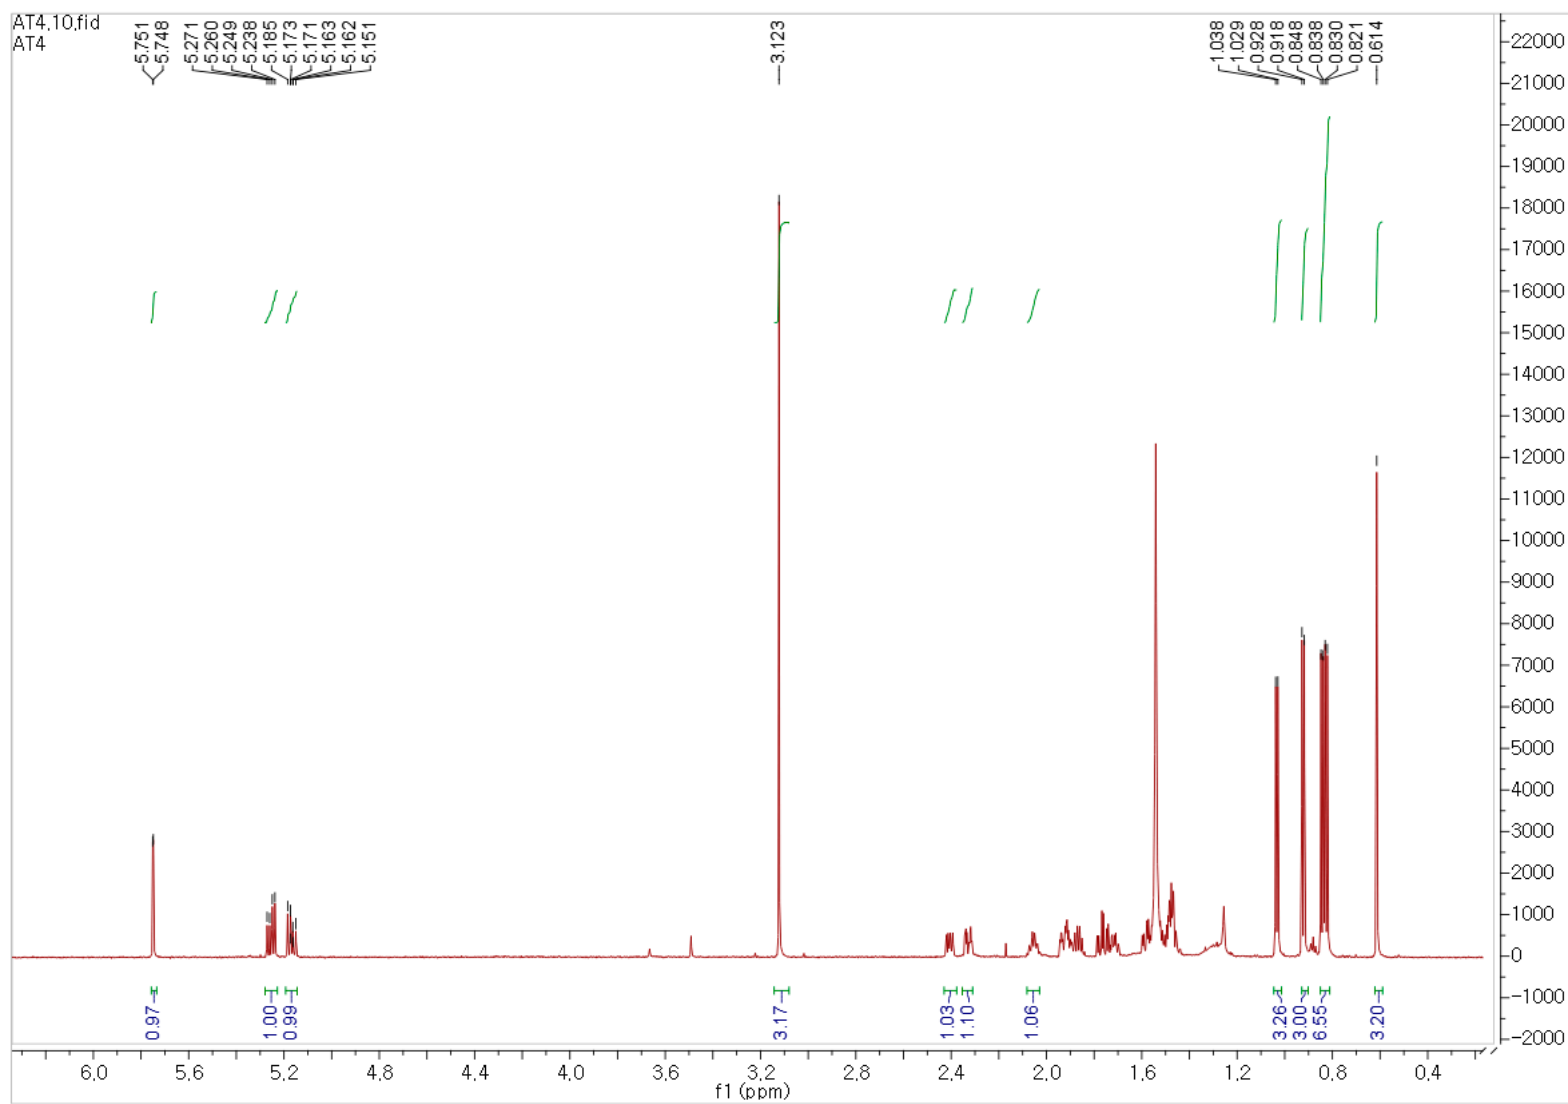

**Figure S4.** The  $^{13}\text{C}$  NMR spectrum of **3** ( $\text{CDCl}_3$ , 175 MHz)

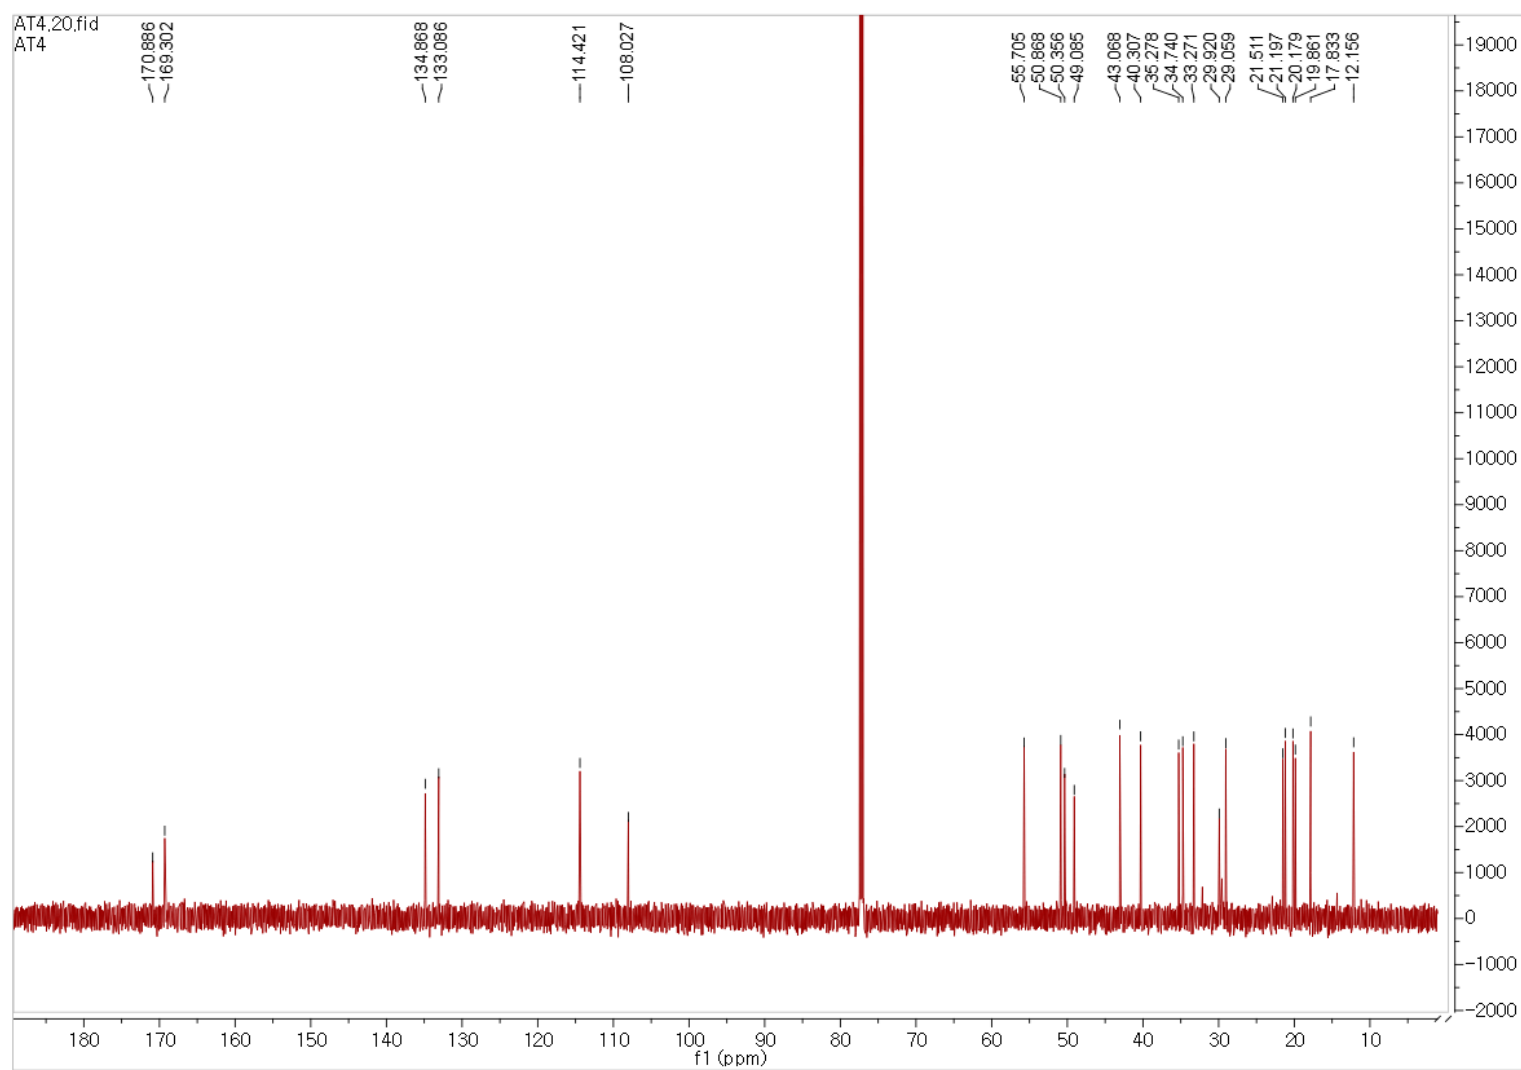

**Figure S5.** The  $^1\text{H}$  NMR spectrum of **4** ( $\text{CD}_3\text{OD}$ , 700 MHz)

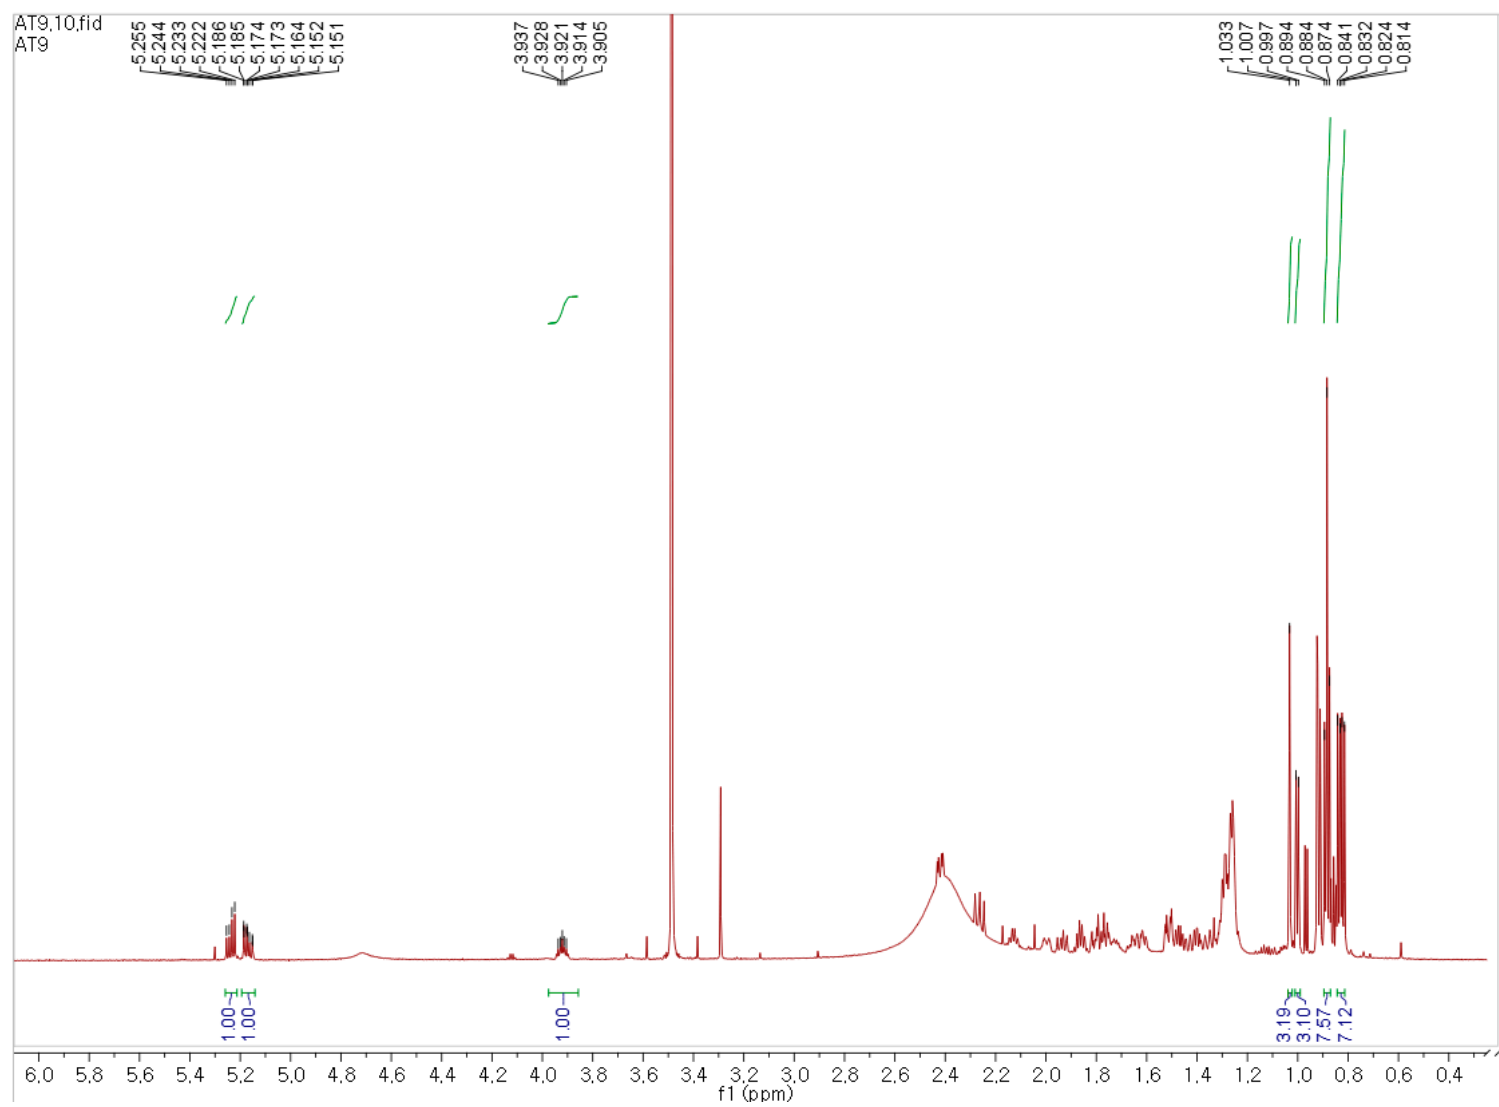

**Figure S6.** The  $^1\text{H}$  NMR spectrum of **5** ( $\text{CDCl}_3$ , 700 MHz)

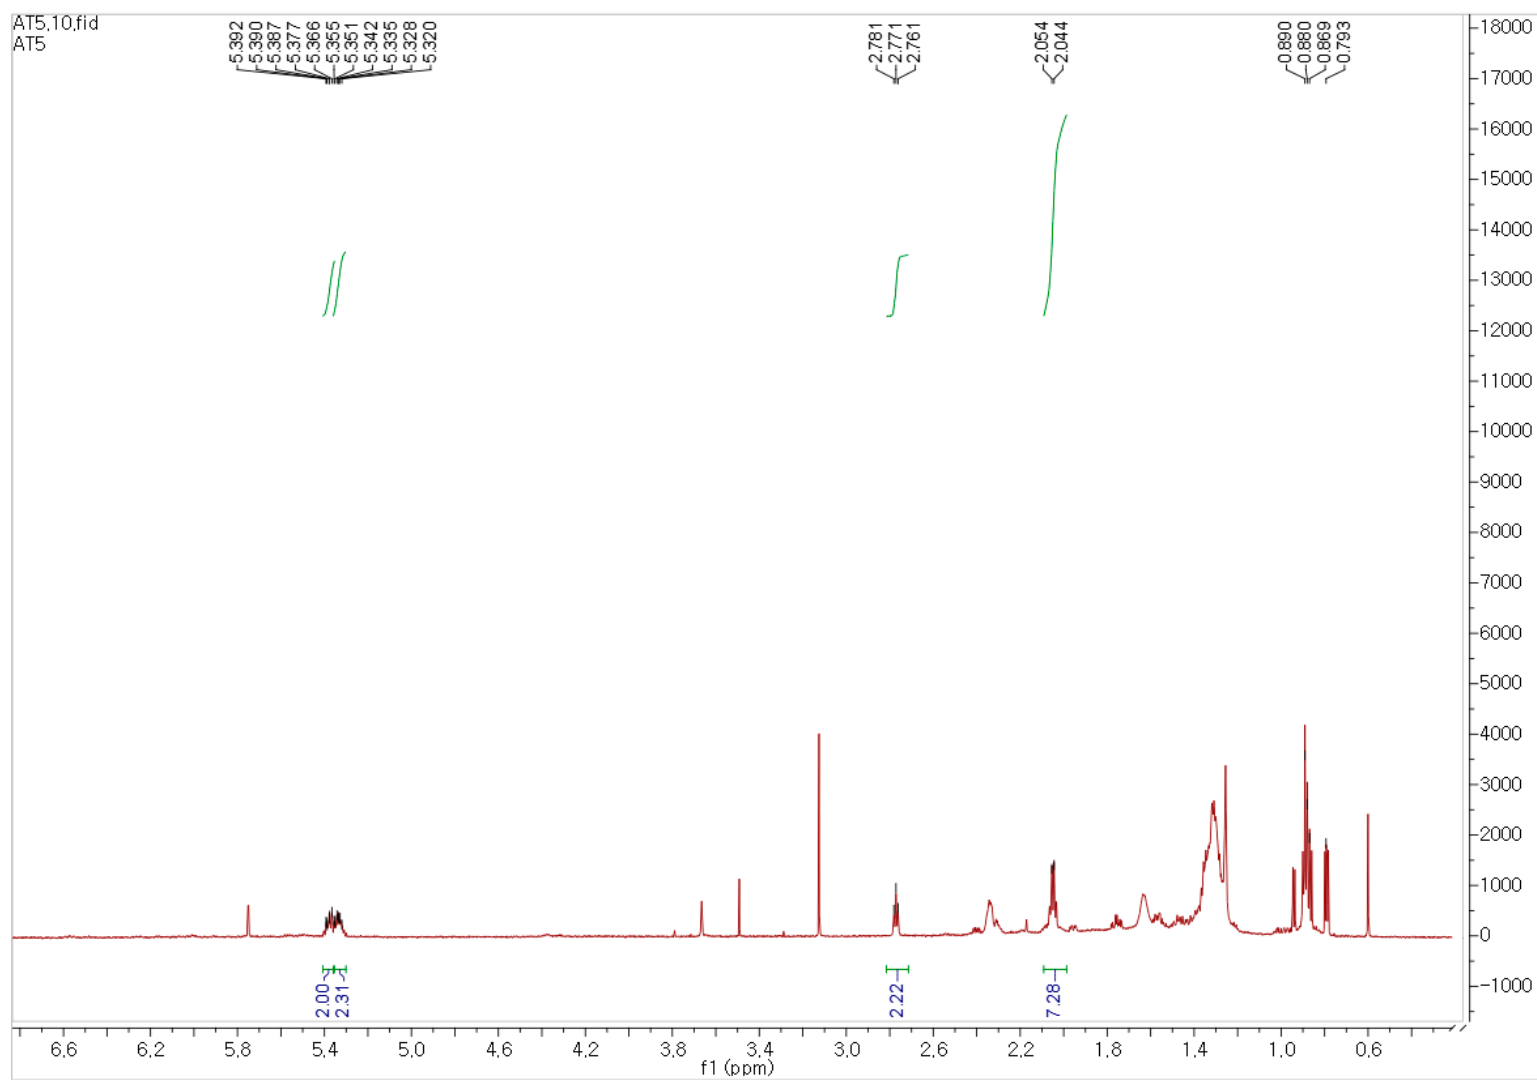



**Figure S7.** The  $^1\text{H}$  NMR spectrum of **6** ( $\text{CDCl}_3$ , 700 MHz)

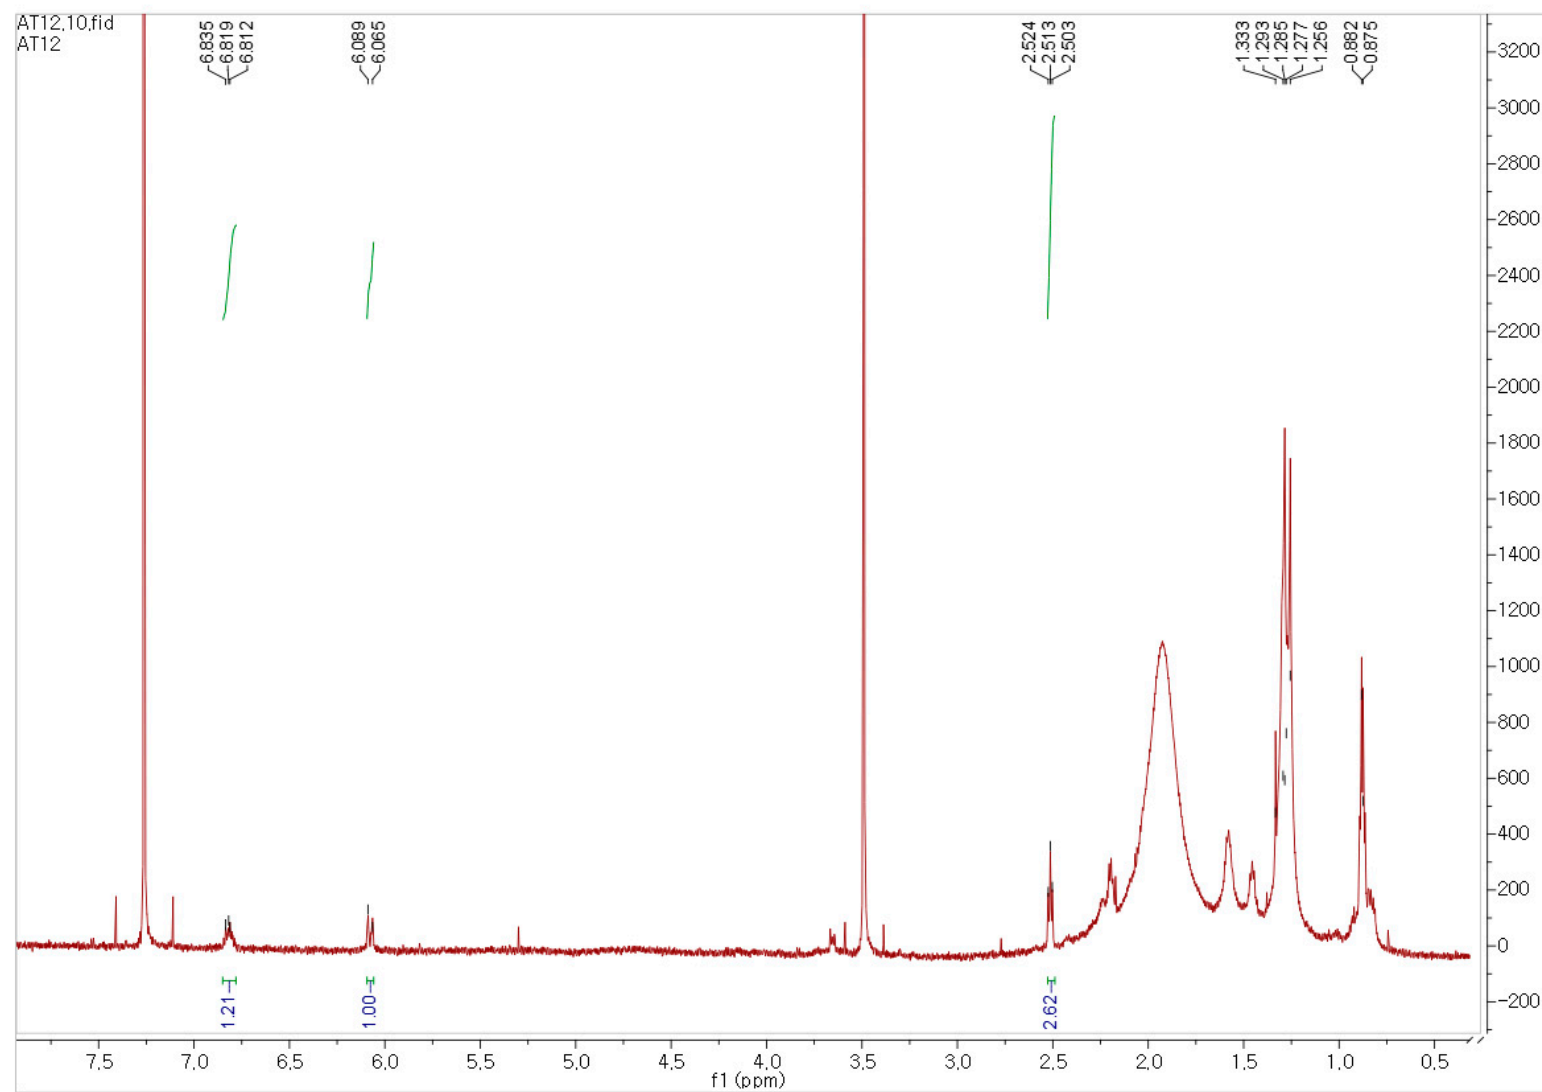

**Figure S8.** The  $^1\text{H}$  NMR spectrum of **7** ( $\text{CDCl}_3$ , 700 MHz)

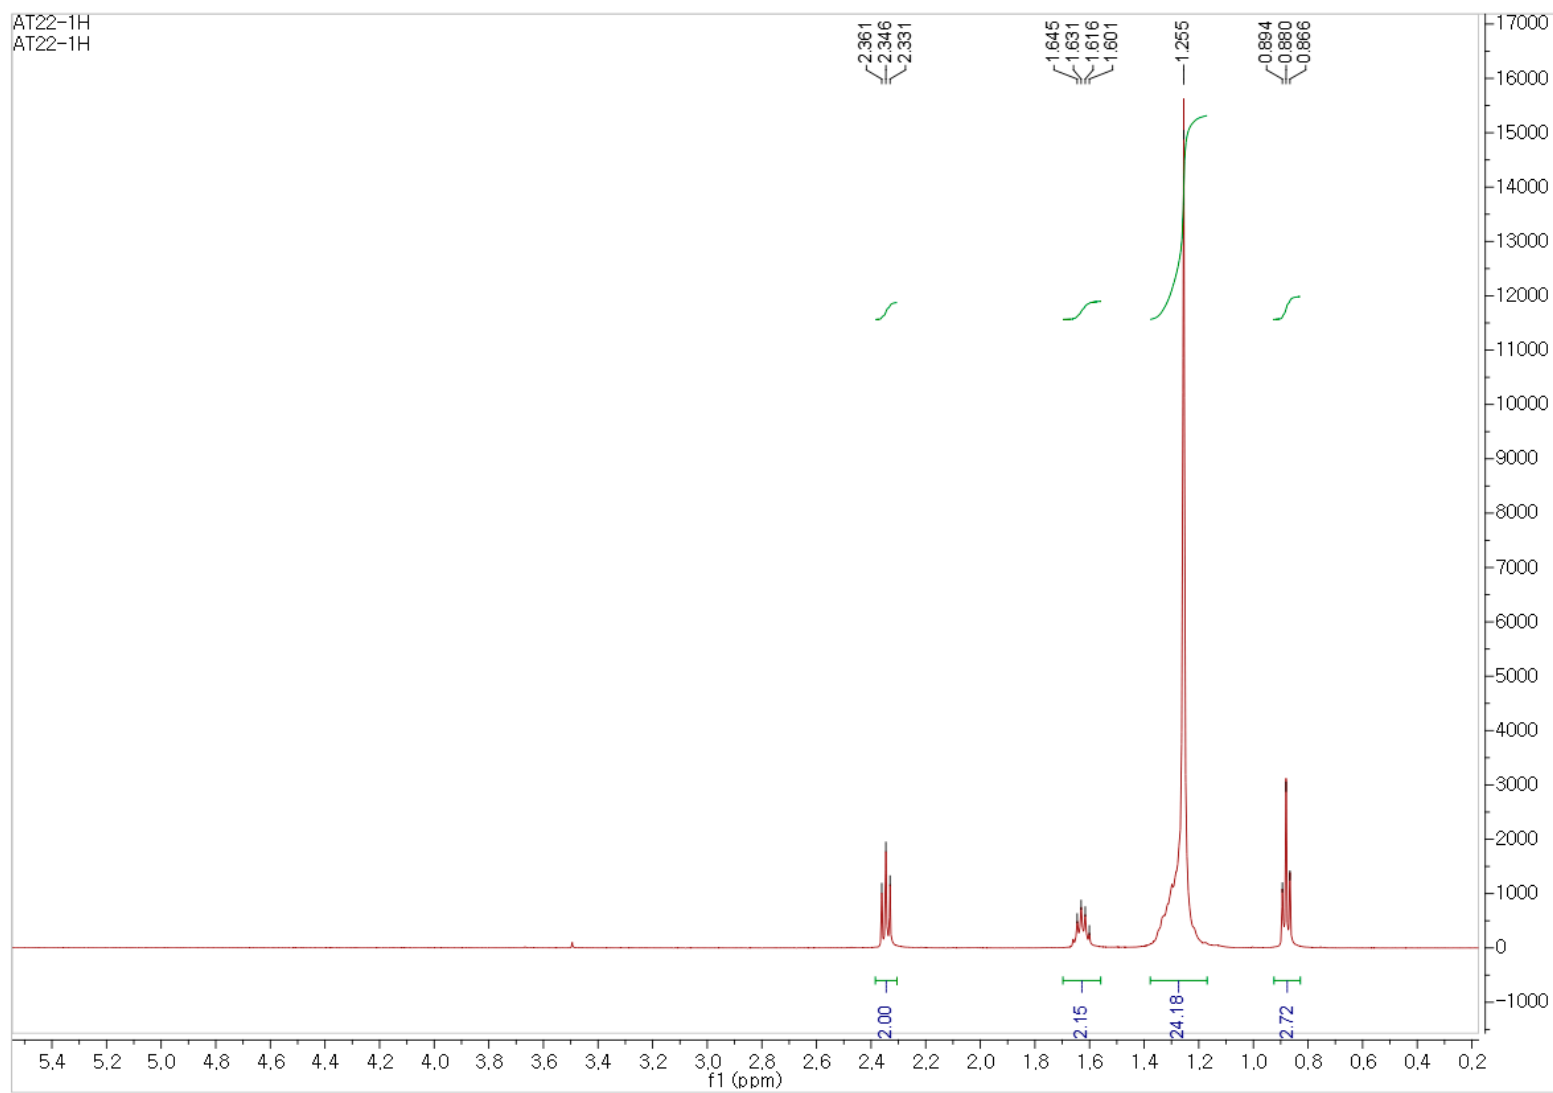

**Figure S9.** The  $^1\text{H}$  NMR spectrum of **8** ( $\text{CDCl}_3$ , 700 MHz)

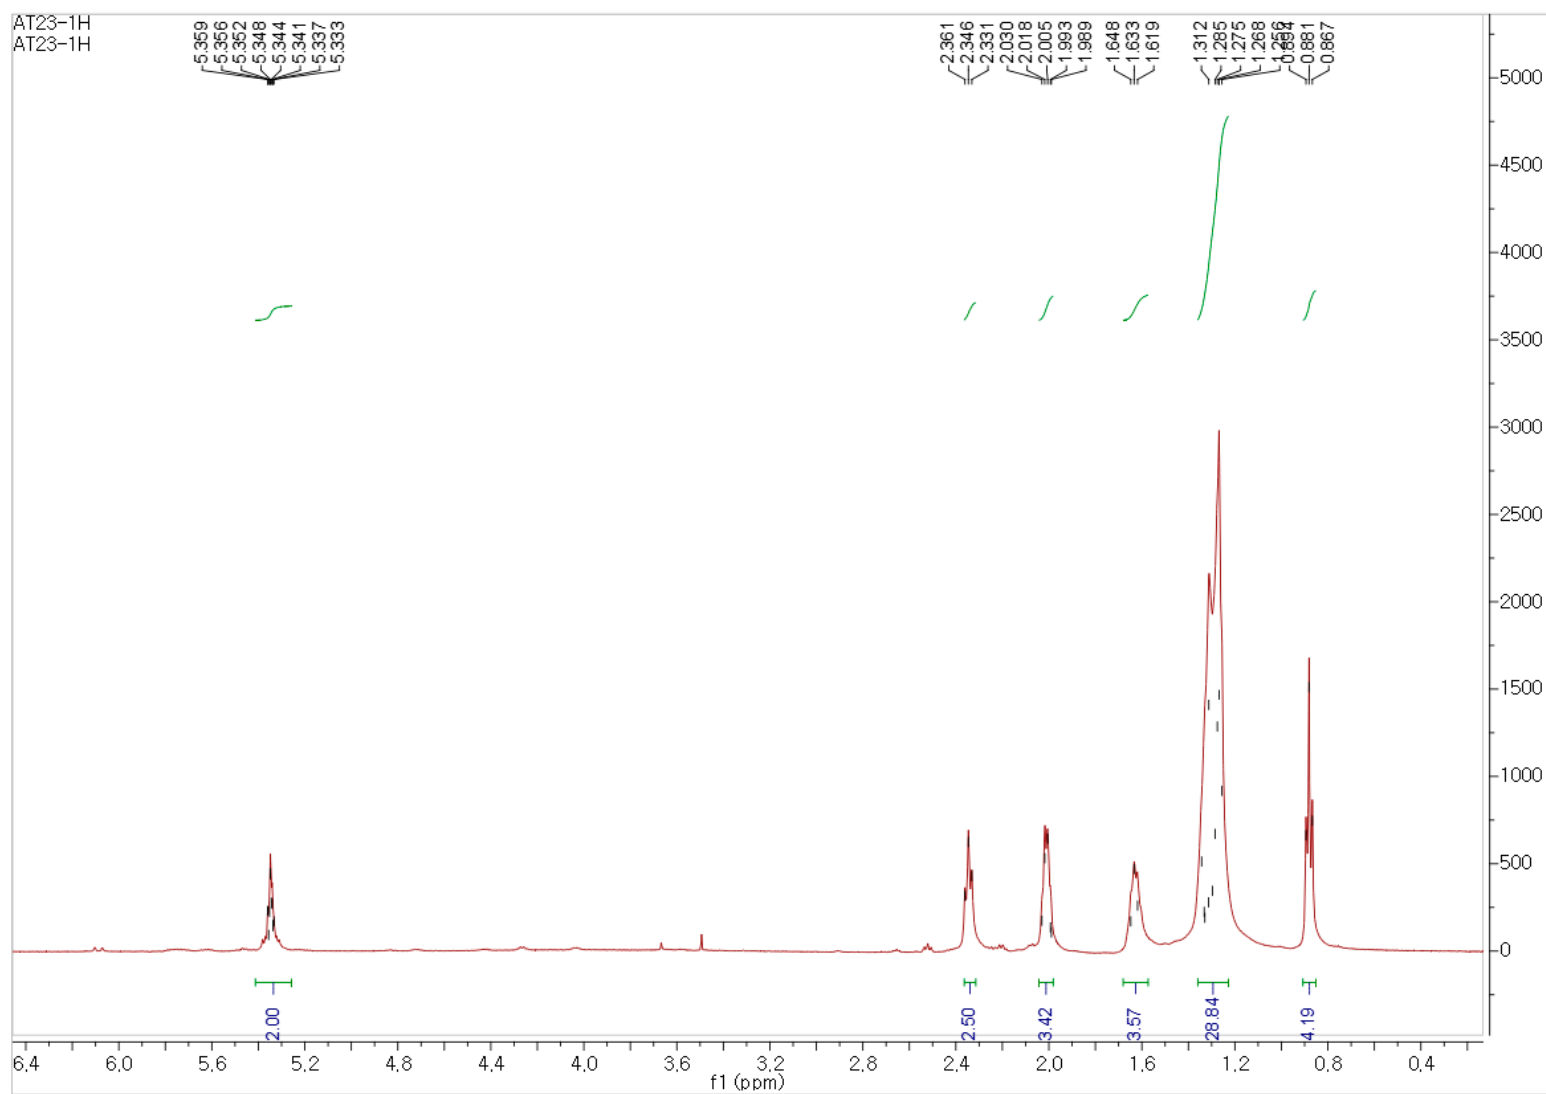

**Figure S10.** Total ion chromatogram (TIC) of compound **1** in the LC/MS analysis.

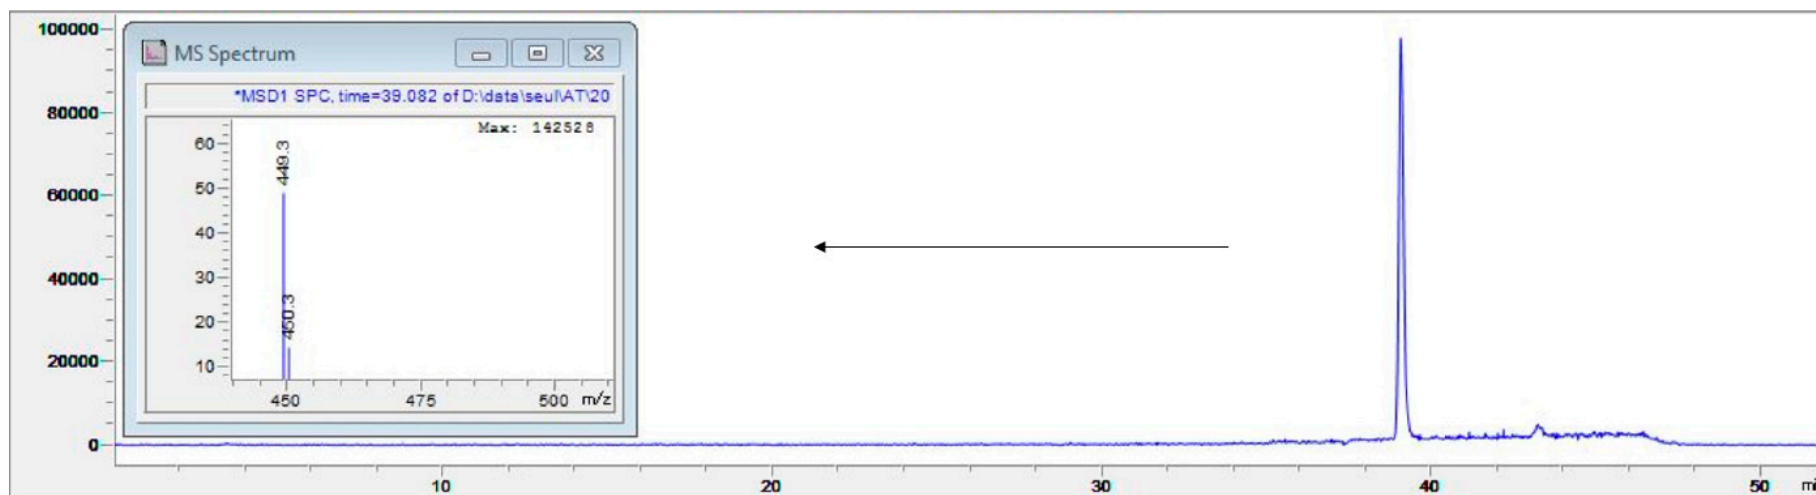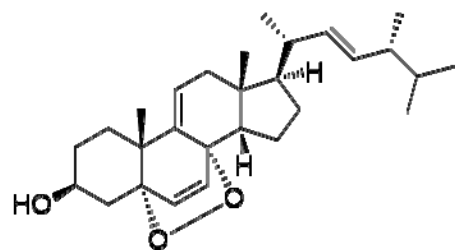

449.3 [M+Na]<sup>+</sup>

**Figure S11.** TIC of compound **2** in the LC/MS analysis.

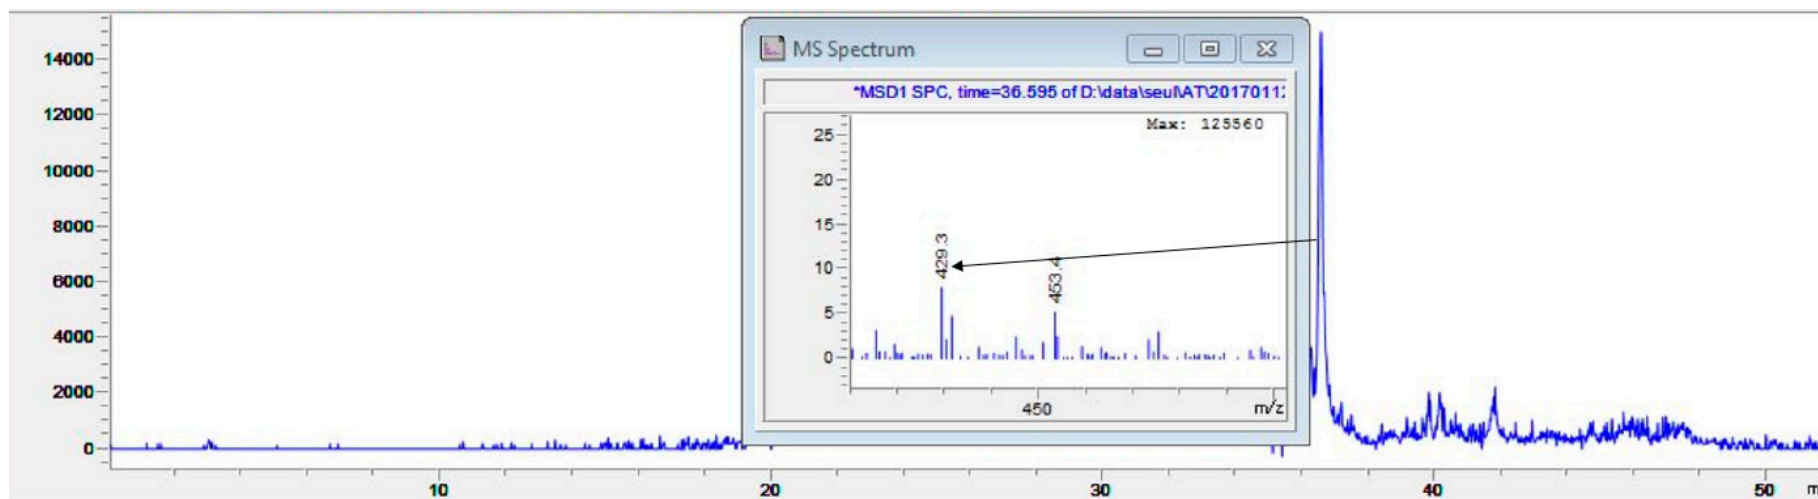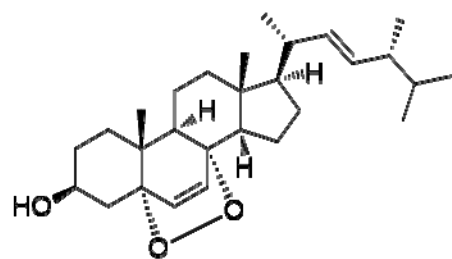

**429.3 [M+H]<sup>+</sup>**

**Figure S12.** TIC of compound **3** in the LC/MS analysis.

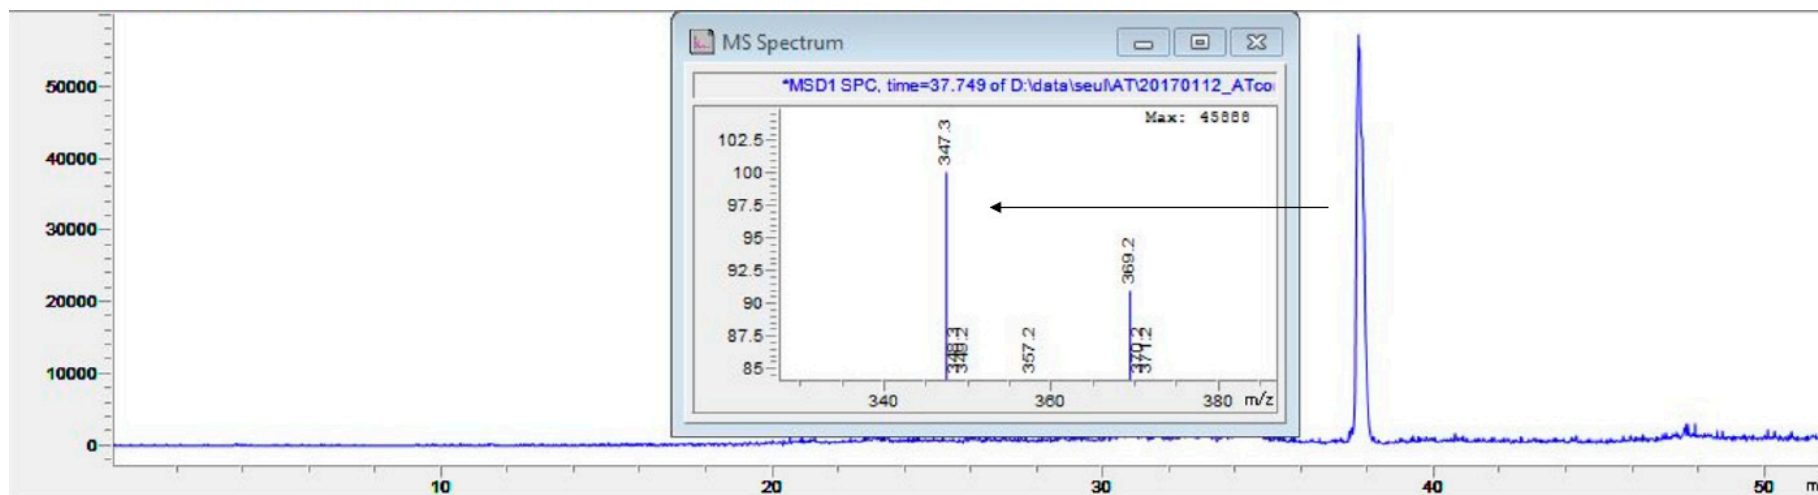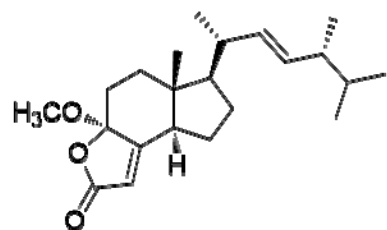

**347.3 [M+H]<sup>+</sup>**

**Figure S13.** TIC of compound **4** in the LC/MS analysis.

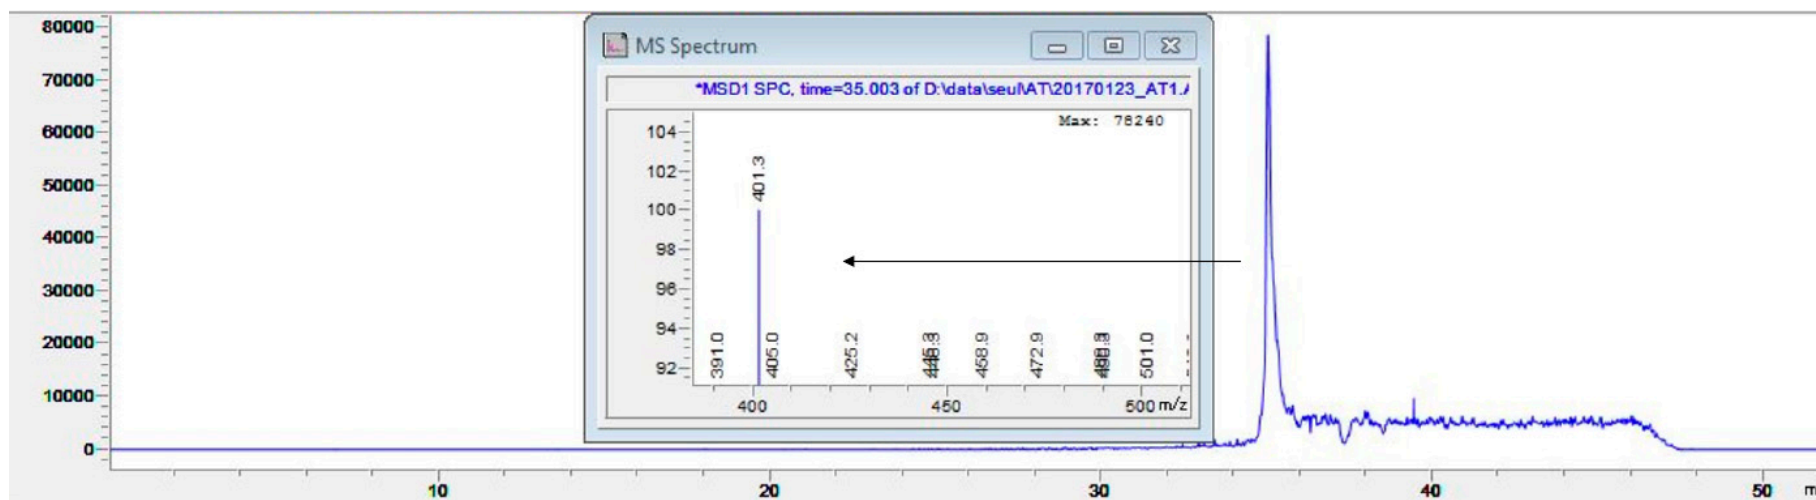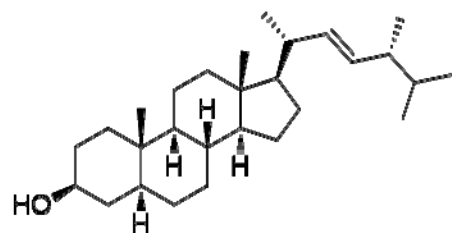

401.3 [M+H]<sup>+</sup>

**Figure S14.** TIC of compound **5** in the LC/MS analysis.

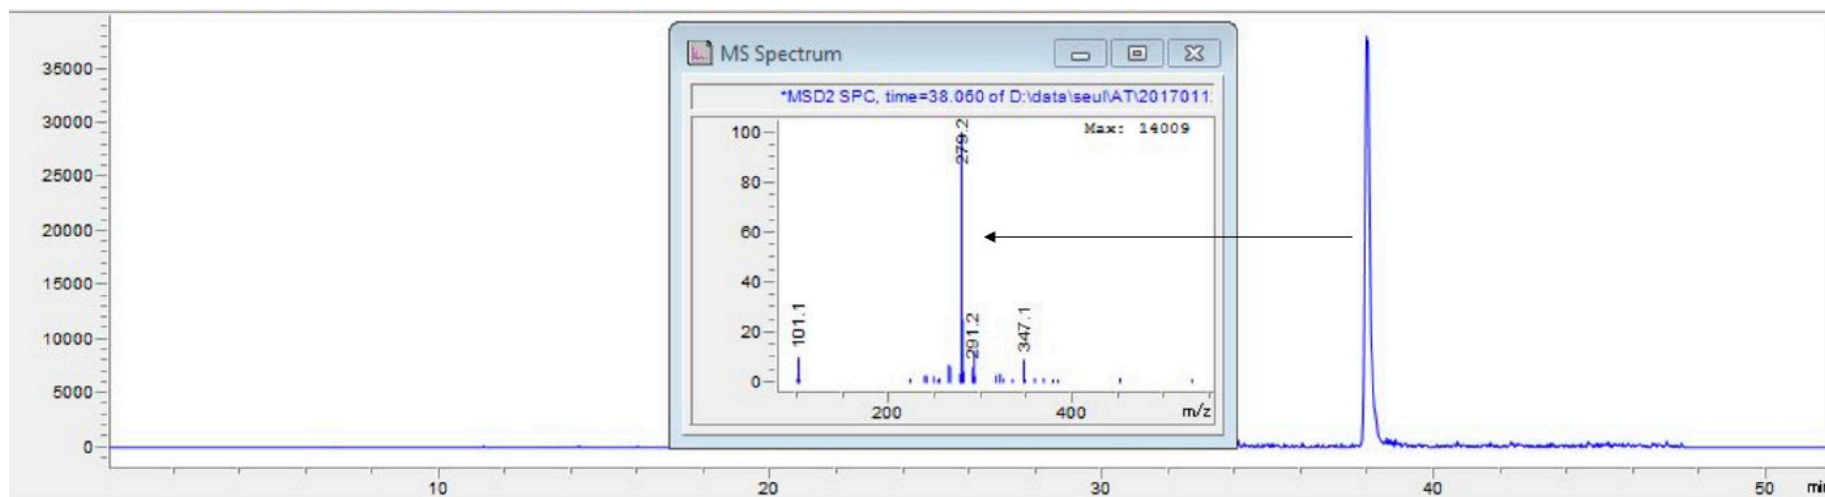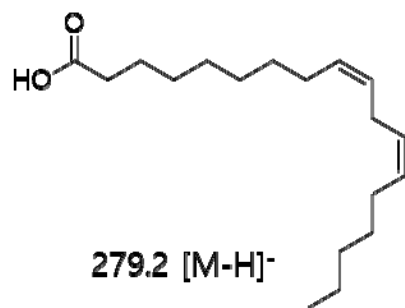



**Figure S15.** TIC of compound **6** in the LC/MS analysis.

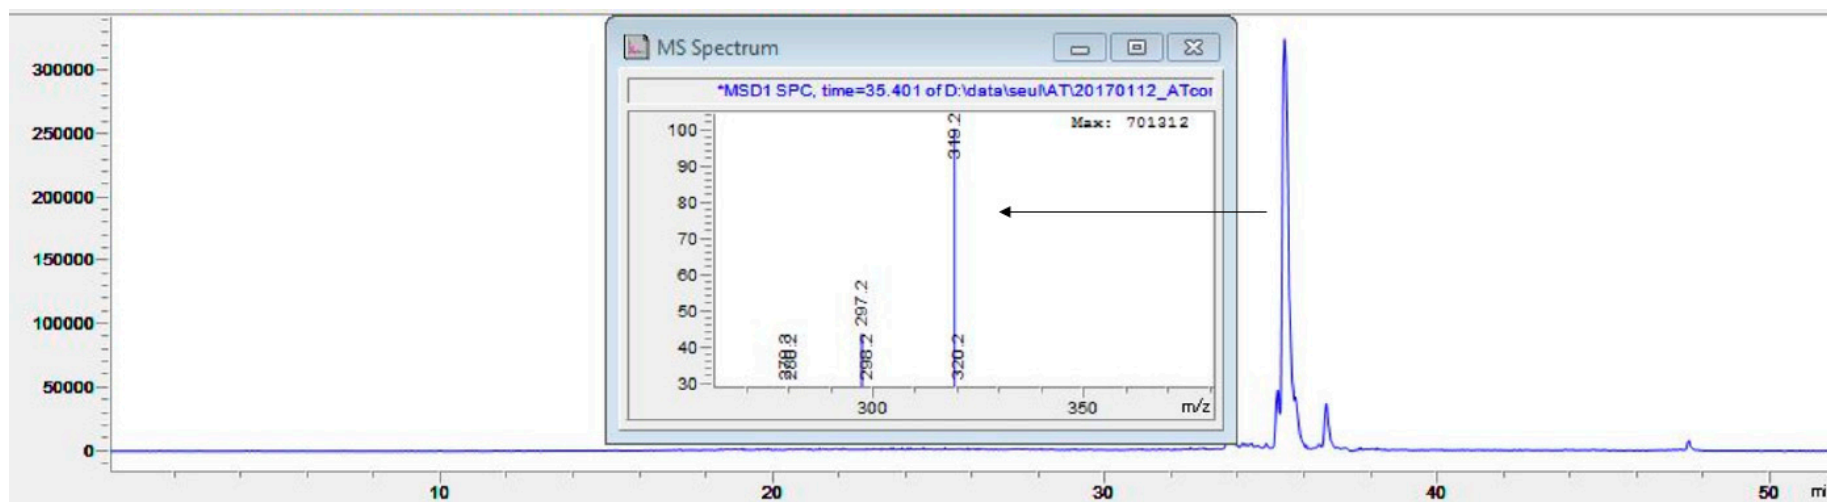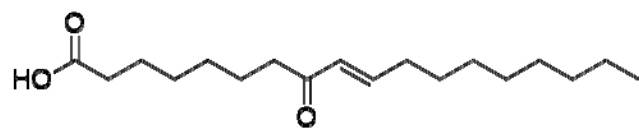

**319.2 [M+Na]<sup>+</sup>**

**Figure S16.** TIC of compound **7** in the LC/MS analysis.

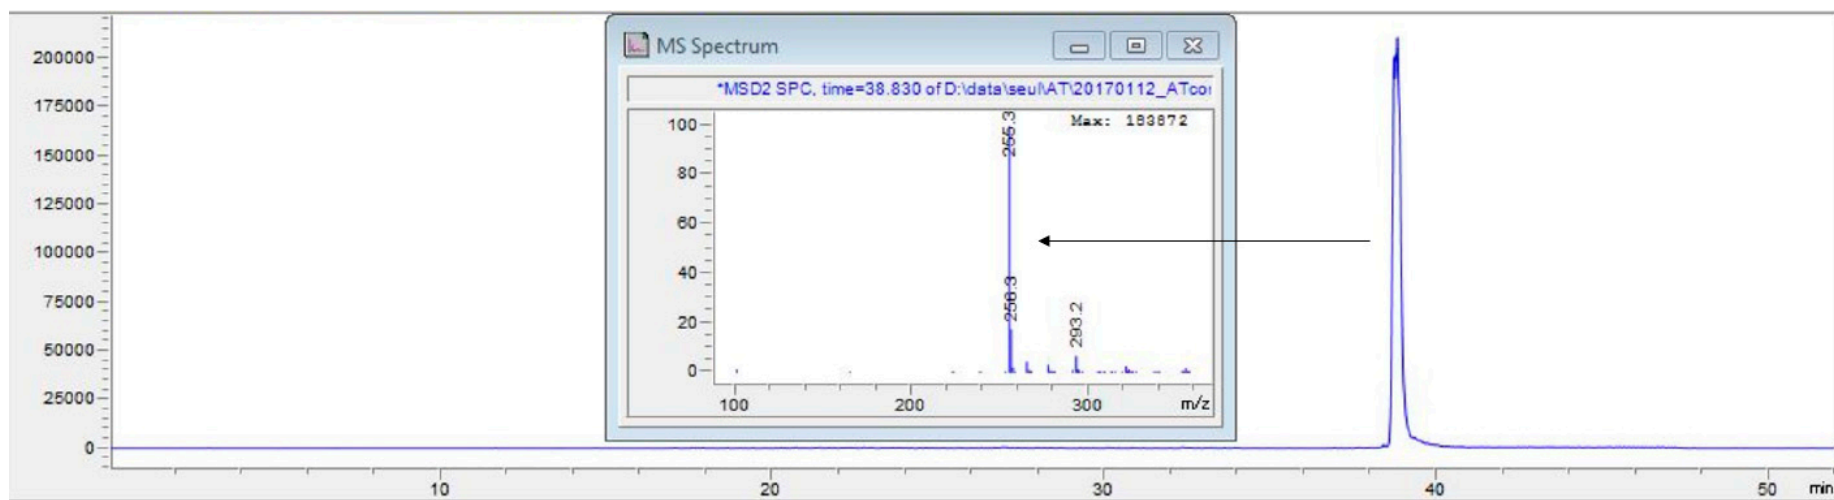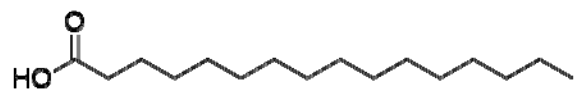

**255.3 [M-H]<sup>-</sup>**

**Figure S17.** TIC of compound **8** in the LC/MS analysis.

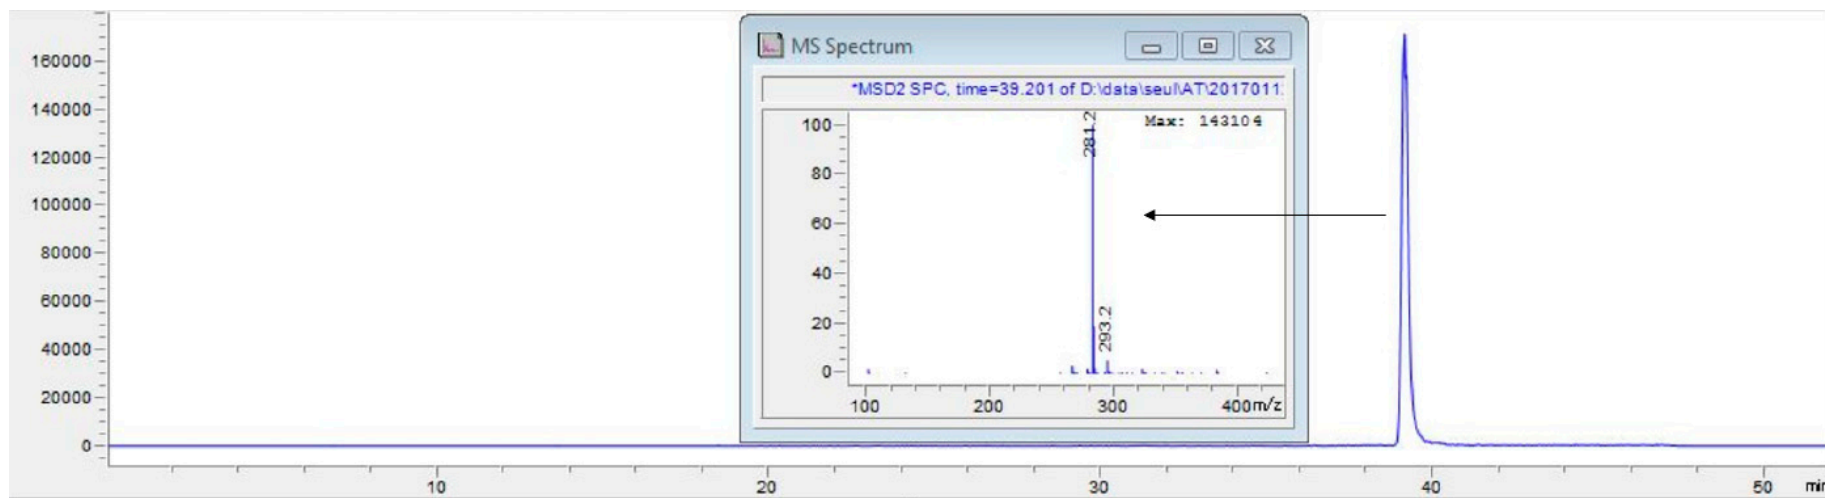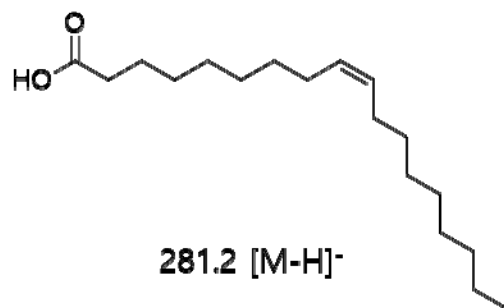

**Figure S18.** UV chromatogram of LC/MS (detection wavelength was set as 254 nm) of (A) hexane-soluble and (B) CH<sub>2</sub>Cl<sub>2</sub>-soluble factions.

(A)

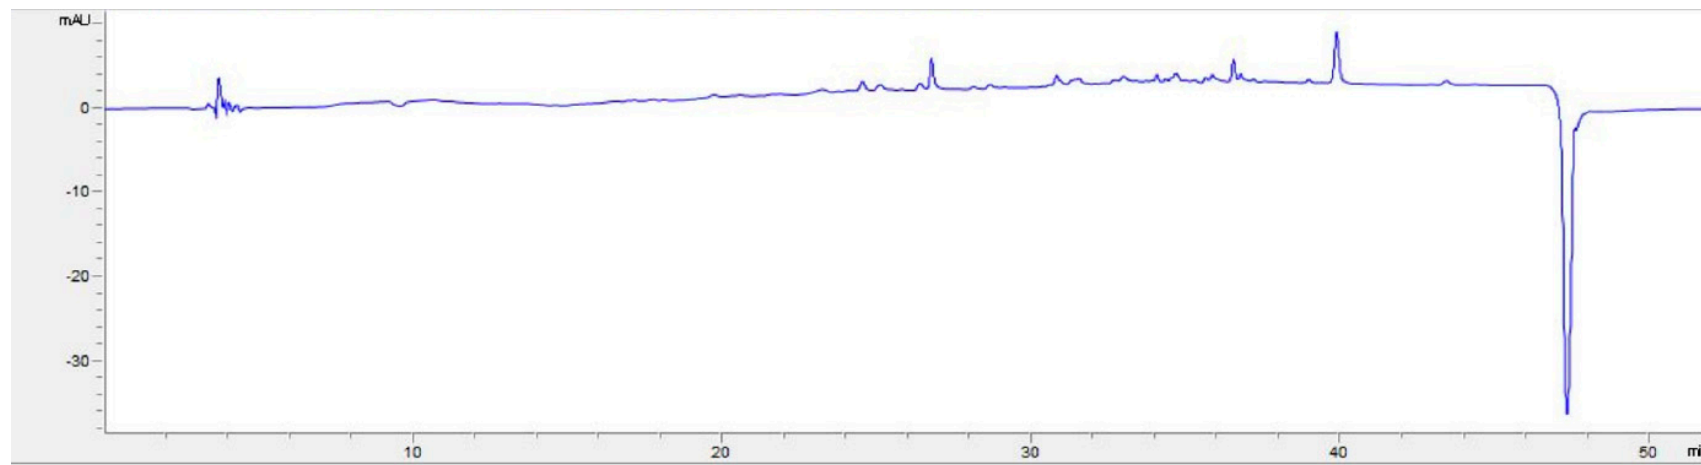

(B)

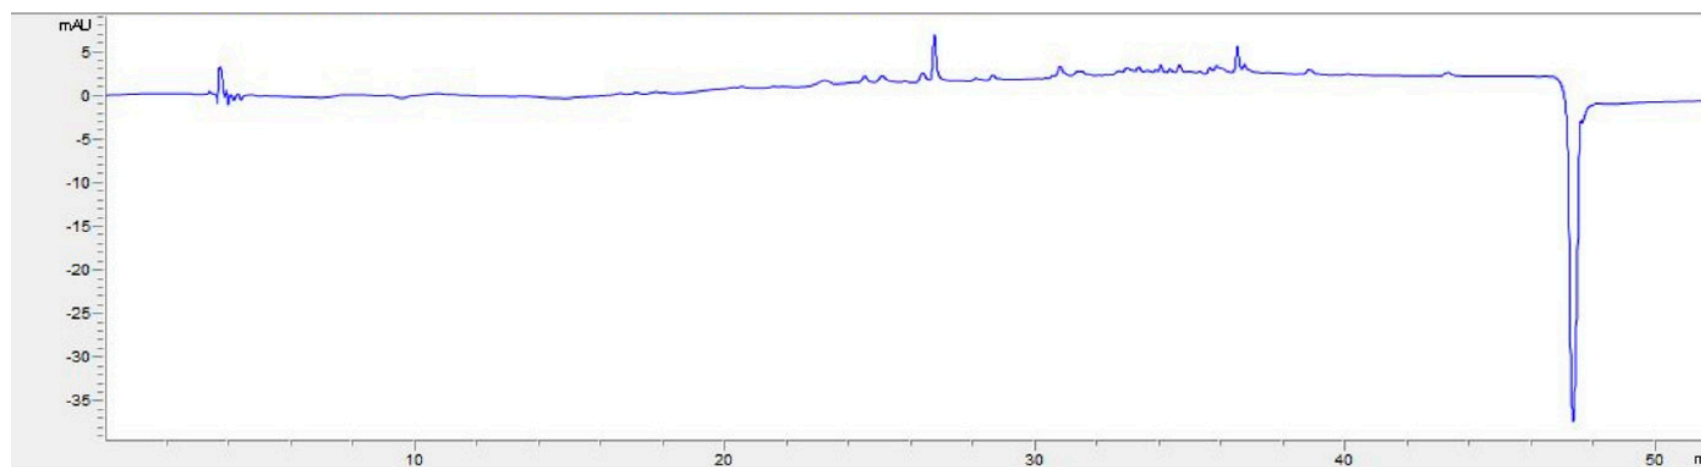

**Figure S19.** TLC analysis of (A) hexane-soluble and (B) CH<sub>2</sub>Cl<sub>2</sub>-soluble factions.

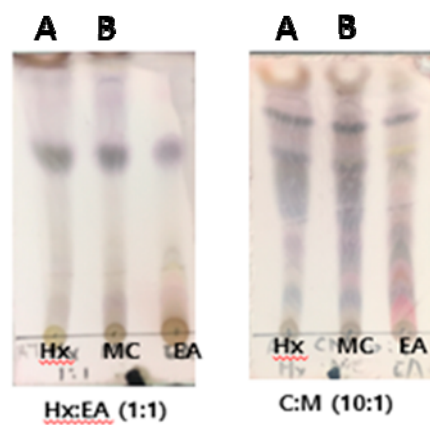

Supplement: s1 [file s1]
